# Supplementary material for: Successful reprogramming of cellular protein production through mRNA delivered by functionalized lipid nanoparticles
Source: PubMed Central journal article supplement — Proc Natl Acad Sci U S A. 2018 Mar 27;115(15):E3351–60. doi: 10.1073/pnas.1720542115 (PMC5899464; doi:10.1073/pnas.1720542115), 2018-03-27
Supplement: pnas.201720542SI.pdf [file pnas.201720542SI.pdf]

# Supporting Information

Yanez Arteta et al. 10.1073/pnas.1720542115

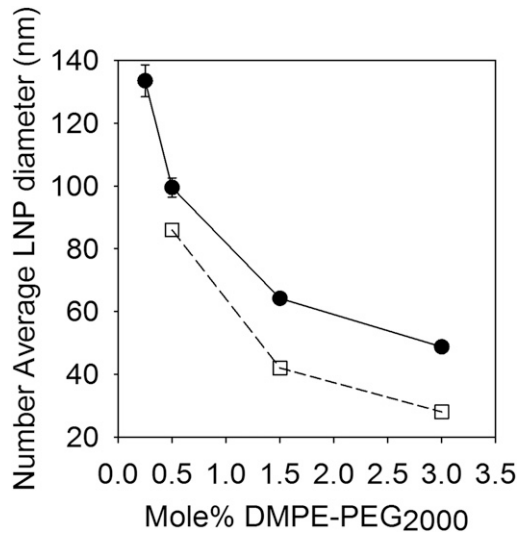

**Fig. S1.** LNP size for different amounts of PEG lipids. Size of mRNA-LNPs (closed circles) and empty LNPs (open squares), expressed as the number averaged LNP diameter, as a function of the mole percent of DMPE-PEG<sub>2000</sub>. Lines are to guide the eye. Values are mean  $\pm$  SEM ( $n = 3$ ).

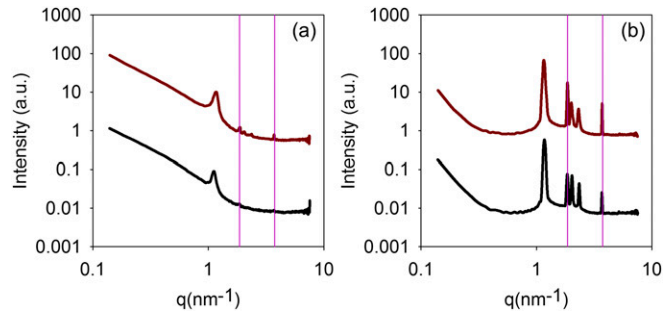

**Fig. S2.** Characterization of LNP bulk phase using SAXS. SAXS data for DLin-MC3-DMA:Chol mixtures in 50:38.5 (red curve) and 50:28.5 (black curve) mole ratio in the (A) presence of polyA and (B) absence, which have been dialyzed against buffer pH 3:ethanol 3:1 volume mixture. The pink vertical lines correspond to cholesterol monohydrate crystals. The intensity of the samples has been offset for clarity.

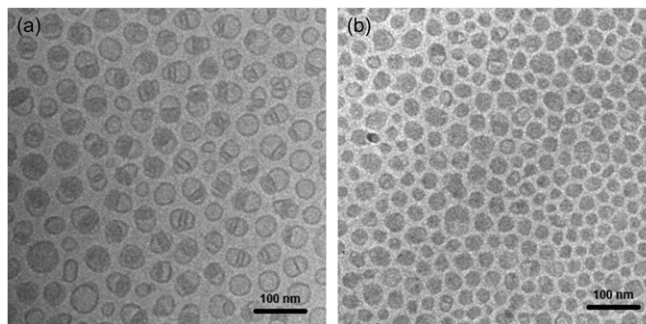

**Fig. S3.** Cryo-TEM characterization of LNPs in pH 3 and 25% ethanol. Cryo-TEM images of LNPs with lipid molar compositions of DLin-MC3-DMA:DSPC:Chol:DMPE-PEG<sub>2000</sub> in the ratio 50:10:38.5:1.5 in buffer pH 3:ethanol 3:1 volume mixture in the (A) absence and (B) presence of mRNA.

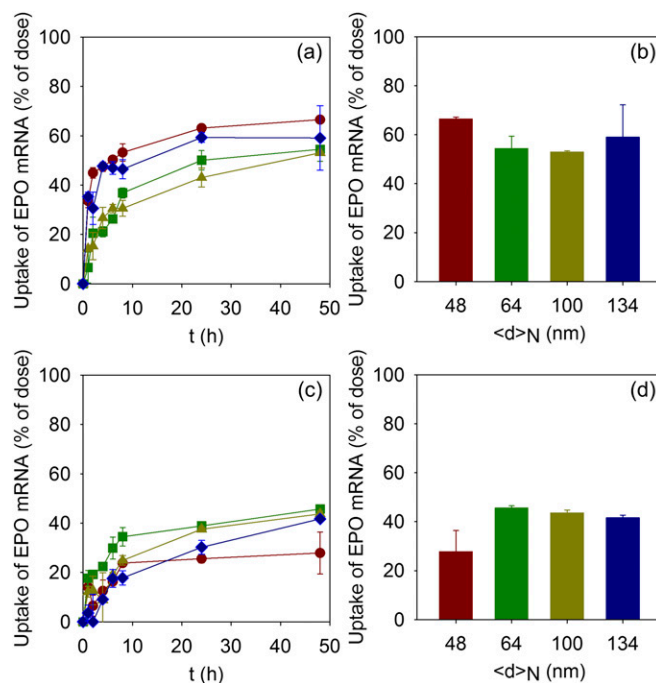

**Fig. S4.** Cellular uptake of LNPs. (A and C) Uptake of LNPs expressed as the percent of EPO mRNA dosed as a function of time in (A) adipocytes and (C) hepatocytes for LNPs with constant surface composition and different size:  $\langle d \rangle_N = 47$  nm (red circles),  $\langle d \rangle_N = 64$  nm (green squares),  $\langle d \rangle_N = 99$  nm (yellow triangles), and  $\langle d \rangle_N = 133$  nm (blue diamonds). Lines are to guide the eye. (B and D) Uptake of LNPs expressed as the percent of EPO mRNA dosed after 48 h postdosing (B) adipocytes and (D) hepatocytes for LNPs with the same lipid composition as A and C. The experiments were done in the presence of 1% human serum. Values are means  $\pm$  SEM ( $n = 3$ ).

**Table S1. Molecular volume and neutron and X-ray SLD of the LNPs' main components**

| Component    | Molecular volume ( $\times 10^3$ nm <sup>3</sup> ) | SLD neutron ( $\times 10^{-4}$ nm <sup>-2</sup> )* | SLD X-ray ( $\times 10^{-4}$ nm <sup>-2</sup> ) |
|--------------|----------------------------------------------------|----------------------------------------------------|-------------------------------------------------|
| Water        | 30                                                 | -0.56/6.4                                          | 9.5                                             |
| DLin-MC3-DMA | 1,290 <sup>†</sup>                                 | 0.09                                               | 7.9                                             |
| Cholesterol  | 630 <sup>‡</sup>                                   | 0.21/1.4                                           | 9.7                                             |
| DSPC         | 1,322 <sup>§</sup>                                 | 0.18/6.7                                           | 9.4                                             |
| DMPE         | 1,023 <sup>§</sup>                                 | 0.31                                               | 9.7                                             |
| PEG unit     | 670 <sup>¶</sup>                                   | 0.62                                               | 13                                              |
| RNA          | 325 <sup>#</sup>                                   | 3.6/4.5                                            | 16                                              |

\*The components with two SLD values correspond to the hydrogenous and deuterated form, respectively, whereas the molecules with only a single value refer to the standard hydrogenous form.

<sup>†</sup>Determined from the measured density.

<sup>‡</sup>Taken from Greenwood et al. (1).

<sup>§</sup>Taken from Armen et al. (2).

<sup>¶</sup>Calculated from the density given by Cheng et al. (3).

<sup>#</sup>Estimated average nucleotide volume from the average nucleotide molar mass and the density calculated by Voss and Gerstein (4).

- Greenwood AI, Tristram-Nagle S, Nagle JF (2006) Partial molecular volumes of lipids and cholesterol. *Chem Phys Lipids* 143:1–10.
- Armen RS, Uitto OD, Feller SE (1998) Phospholipid component volumes: Determination and application to bilayer structure calculations. *Biophys J* 75: 734–744.
- Cheng G, et al. (2008) Small angle neutron scattering study of conformation of oligo(ethylene glycol)-grafted polystyrene in dilute solutions: Effect of the backbone length. *Macromolecules* 41:9831–9836.
- Voss NR, Gerstein M (2005) Calculation of standard atomic volumes for RNA and comparison with proteins: RNA is packed more tightly. *J Mol Biol* 346:477–492.
